# Supplementary material
Source: HighWire-hosted journal article supplement (https://cmaj.ca/highwire/filestream/59173/field_highwire_adjunct_files/1/clari-garg-2-at.pdf)
Supplement: clari-garg-2-at.pdf [file clari-garg-2-at.pdf]

**Appendix 2** (as supplied by the authors): Coding definitions for hospital admission with rhabdomyolysis, acute kidney injury or hyperkalemia, and all-cause mortality\*

| Condition            | Database | Code                    |
|----------------------|----------|-------------------------|
| Rhabdomyolysis       | CIHI-DAD | ICD-10 M628, T296, G210 |
| Acute kidney injury  | CIHI-DAD | ICD-10 N17              |
| Hyperkalemia         | CIHI-DAD | ICD-10 E875             |
| All-cause mortality† | RPDB     | Vital status field      |

CIHI DAD = Canadian Institute for Health Information Discharge Abstract Database; ICD-10 = International Classification of Diseases, Tenth Revision; RPDB = Registered Persons Database of Ontario.

\*Validations of rhabdomyolysis (unpublished data), acute kidney injury and hyperkalemia were performed on 39,500 hospital admissions with linked laboratory values.<sup>[1,2]</sup>

†Has a sensitivity of 94% and a positive predictive value of 100%.<sup>[3]</sup>

## References

1. Hwang YJ, Shariff S, Gandhi S, et al. Validity of the *International Classification of Diseases, Tenth Revision* code for acute kidney injury in elderly patients at presentation to the emergency department and at hospital admission. *BMJ Open* 2012;2: e001821.
2. Fleet JL, Shariff S, Gandhi S, et al. Validity of the *International Classification of Diseases 10th revision* code for hyperkalaemia in elderly patients at presentation to an emergency department and at hospital admission. *BMJ Open* 2012;2:e002011.
3. Jha P, Deboer D, Sykora K, et al. Characteristics and mortality outcomes of thrombolysis trial participants and nonparticipants: a population-based comparison. *J Am Coll Cardiol* 1996;27:1335-42.
